# Supplementary material for: Use of Fish Scale-Derived BioCornea to Seal Full-Thickness Corneal Perforations in Pig Models
Source: PLoS One. 2015 Nov 24;10(11):e0143511. doi: 10.1371/journal.pone.0143511 (PMC4657996; doi:10.1371/journal.pone.0143511)
Supplement: S1 Table — (XLSX) [file pone.0143511.s002.xlsx]

## Sheet: 工作表1
thickness (mm)
	pre	post	D1	D2	D3
T1	711	884.5	1295	1230	1095
T2	711	849	1105	1120	1200
T3	681	765	1235	1300	1310
T4	737	930.5	1220	1310	1190
T5	702	817.5	1160	1180	1106
T6	664	752	909	1275	1190
T7	698	932.5	1095	1080	1004
T8	728	810.5	1066	1066	1072
anterior chamber angle
	pre	post	D1	D2	D3
T1	31.58	0	25.36	17.11	0
T2	31.4	0	23.59	24.7	7.09
T3	31.89	0	31.06	31.64	28.45
T4	31.73	0	21.33	29.76	18.07
T5	32.35	0	10.32	5.59	8.14
T6	29.88	18.03	21.91	0	0
T7	36.57	0	26.2	24.31	27.64
T8	34.8	0	22.99	22.35	20.37
